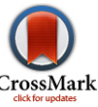

# A Comprehensive Analysis of the Cupin Gene Family in Soybean (*Glycine max*)

Xiaobo Wang<sup>1</sup>, Haowei Zhang<sup>1</sup>, Yali Gao<sup>1</sup>, Genlou Sun<sup>1,3</sup>, Wenming Zhang<sup>1</sup>, Lijuan Qiu<sup>2\*</sup>

**1** School of Agronomy, Anhui Agricultural University, Hefei, China, **2** National Key Facility for Gene Resources and Genetic Improvement/Key Laboratory of Crop Germplasm Utilization, Ministry of Agriculture, Institute of Crop Science, Chinese Academy of Agricultural Science, Beijing, China, **3** Biology Department, Saint Mary's University, Halifax, NS, Canada

## Abstract

Cupin superfamily of proteins, including germin and germin-like proteins (GLPs) from higher plants, is known to play crucial roles in plant development and defense. To date, no systematic analysis has been conducted in soybean (*Glycine max*) incorporating genome organization, gene structure, expression compendium. In this study, 69 putative *Cupin* genes were identified from the whole-genome of soybean, which were non-randomly distributed on 17 of the 20 chromosomes. These *GmCupin* proteins were phylogenetically clustered into ten distinct subgroups among which the gene structures were highly conserved. Eighteen pairs (52.2%) of duplicate paralogous genes were preferentially retained in duplicated regions of the soybean genome. The distributions of *GmCupin* genes implied that long segmental duplications contributed significantly to the expansion of the *GmCupin* gene family. According to the RNA-seq data analysis, most of the *GmCupins* were differentially expressed in tissue-specific expression pattern and the expression of some duplicate genes were partially redundant while others showed functional diversity, suggesting the *GmCupins* have been retained by substantial subfunctionalization during soybean evolutionary processes. Selective analysis based on single nucleotide polymorphisms (SNPs) in cultivated and wild soybeans revealed sixteen *GmCupins* had selected site(s), with all SNPs in *GmCupin10.3* and *GmCupin07.2* genes were selected sites, which implied these genes may have undergone strong selection effects during soybean domestication. Taken together, our results contribute to the functional characterization of *GmCupin* genes in soybean.

**Citation:** Wang X, Zhang H, Gao Y, Sun G, Zhang W, et al. (2014) A Comprehensive Analysis of the Cupin Gene Family in Soybean (*Glycine max*). PLoS ONE 9(10): e110092. doi:10.1371/journal.pone.0110092

**Editor:** Baohong Zhang, East Carolina University, United States of America

**Received:** July 2, 2014; **Accepted:** September 15, 2014; **Published:** October 31, 2014

**Copyright:** © 2014 Wang et al. This is an open-access article distributed under the terms of the Creative Commons Attribution License, which permits unrestricted use, distribution, and reproduction in any medium, provided the original author and source are credited.

**Data Availability:** The authors confirm that all data underlying the findings are fully available without restriction. All relevant data are within the paper and its Supporting Information files.

**Funding:** This study was supported by the National Natural Science Foundation of China (31201226), the National Natural Science Foundation of Anhui Province (1308085QC49) and the Agricultural Science and Technology Innovation Program of Chinese Academy of Agricultural Sciences. The funders had no role in study design, data collection and analysis, decision to publish, or preparation of the manuscript.

**Competing Interests:** The authors have declared that no competing interests exist.

\* Email: qiuLijuan@caas.cn

## Introduction

The cupin superfamily of proteins, mainly consisted of germin and germin-like protein (GLP) subfamilies, is extremely diverse in plants and possess various enzymatic activities such as sugar-binding metal-independent epimerases, and metal-dependent enzymes possessing dioxygenase, and decarboxylase [1,2]. Germin, initially identified as a specific marker for germination in wheat embryos [3], has been characterized as a homopentameric glycoprotein with oxalate oxidase (OxO) activity [4]. To date, it is speculated to play significant roles in plant development and defense through oxidative breakdown of oxalate, leading to generation of H<sub>2</sub>O<sub>2</sub> [5,6]. Germin like proteins (GLPs), with a high sequence and structural similarity to cereal germains, differ from germin as they mostly lack oxalate oxidase activity, and possess activity of SOD and phosphodiesterase [2,7–9]. Cupin-domain has been reported to be associated with the biological properties in plants. For instance, a group of single cupin-domain related proteins, including two phosphomannose isomerases and two epimerases involved in cell wall synthesis, were identified in *Synechocystis PCC6803* genome [10]. Moreover, a duplicated,

two cupin-domain GLP protein showed close similarity in structure of an oxalate decarboxylase from the fungus *Collybia velutipes* and is considered as a putative progenitor of the storage proteins of land plants [10].

Until now, a total of 27 *GLP* genes have been identified in *Arabidopsis*, and their expression vary in different tissues such as roots, leaves and flowers [11–13]. Lapik et al reported a cupin-domain protein *AtPirin1* could interact with a CCAAT box binding transcription factor, and served as a downstream component of GPA1 in regulating seed germination and early seedling development [14]. Recently, another two GLP proteins (PDGLP1 and PDGLP2) in *Arabidopsis*, which could interact with *Cucurbita maxima* PHLOEM PROTEIN 16 (Cm-PP16), involved in the regulation of growth of primary root through modulating phloem-mediated resource allocation between the primary and lateral root meristems [15]. The PDGLP1 signal peptide was shown to function in localization to the plasmodesmata (PD) by a novel mechanism involving the endoplasmic reticulum-Golgi secretory pathway. Further, in plum (*Prunus salicina*), two GLP-encoding genes (designated as *Ps-GLP1* and *Ps-GLP2*) were cloned, and the regulation was studied throughout fruit develop-

**Table 1.** Summary of Cupin family members in soybean.

| Gene Symbol  | Gene Locus    | Primary transcript | Gene location             | Amino Acids | Extrons |
|--------------|---------------|--------------------|---------------------------|-------------|---------|
| Gmcupin01.1  | Glyma01g04450 | Glyma01g04450.1    | Gm01:3990477-3991986      | 220         | 1       |
| Gmcupin02.1  | Glyma02g01085 | Glyma02g01085.1    | Gm02:816290-817482        | 147         | 2       |
| Gmcupin02.2  | Glyma02g03100 | Glyma02g03100.1    | Gm02:2414696-2415880      | 220         | 1       |
| Gmcupin02.3  | Glyma02g05010 | Glyma02g05010.1    | Gm02:4077995-4078612      | 205         | 1       |
| Gmcupin03.1  | Glyma03g32030 | Glyma03g32030.1    | Gm03: 39840052 - 39842763 | 495         | 4       |
| Gmcupin03.2  | Glyma03g38630 | Glyma03g38630.1    | Gm03:44934345-44933730    | 218         | 2       |
| Gmcupin04.1  | Glyma04g39040 | Glyma04g39040.2    | Gm04:45306333-45307231    | 199         | 3       |
| Gmcupin05.1  | Glyma05g25620 | Glyma05g25620.1    | Gm05:31685194-31686123    | 215         | 2       |
| Gmcupin06.1  | Glyma06g15930 | Glyma06g15930.1    | Gm06:12516557-12517688    | 228         | 1       |
| Gmcupin07.1  | Glyma07g04310 | Glyma07g04310.1    | Gm07:3163391-3164534      | 209         | 1       |
| Gmcupin07.2  | Glyma07g04320 | Glyma07g04320.1    | Gm07:3167203-3168078      | 208         | 1       |
| Gmcupin07.3  | Glyma07g04330 | Glyma07g04330.1    | Gm07:3173276-3174394      | 208         | 1       |
| Gmcupin07.4  | Glyma07g04340 | Glyma07g04340.1    | Gm07:3179749-3180833      | 225         | 1       |
| Gmcupin07.5  | Glyma07g04400 | Glyma07g04400.1    | Gm07:3202414-3203532      | 208         | 1       |
| Gmcupin08.1  | Glyma08g08600 | Glyma08g08600.1    | Gm08:6134739-6134464      | 215         | 2       |
| Gmcupin08.2  | Glyma08g24320 | Glyma08g24320.1    | Gm08:18508831-18509842    | 211         | 1       |
| Gmcupin09.1  | Glyma09g03010 | Glyma09g03010.1    | Gm09:2110529-2109847      | 217         | 2       |
| Gmcupin09.2  | Glyma09g08030 | Glyma09g08030.1    | Gm09:7066672-7066667      | 135         | 1       |
| Gmcupin10.1  | Glyma10g08360 | Glyma10g08360.1    | Gm10:7201264-7200871      | 226         | 2       |
| Gmcupin10.2  | Glyma10g11935 | Glyma10g11935.1    | Gm10:12509357-12509734    | 125         | 1       |
| Gmcupin10.3  | Glyma10g28010 | Glyma10g28010.1    | Gm10:36807794-36807686    | 221         | 2       |
| Gmcupin10.4  | Glyma10g28020 | Glyma10g28020.1    | Gm10:36812065-36811696    | 220         | 2       |
| Gmcupin10.5  | Glyma10g28190 | Glyma10g28190.1    | Gm10:36981942-36980791    | 223         | 2       |
| Gmcupin10.6  | Glyma10g31200 | Glyma10g31200.2    | Gm10:39762112-39761524    | 198         | 3       |
| Gmcupin10.7  | Glyma10g31210 | Glyma10g31210.1    | Gm10:39768393-39768098    | 232         | 2       |
| Gmcupin10.8  | Glyma10g42611 | Glyma10g42611.1    | Gm10:49519941-49520574    | 177         | 3       |
| Gmcupin12.1  | Glyma12g09630 | Glyma12g09630.2    | Gm12:7391558-7392181      | 207         | 1       |
| Gmcupin12.2  | Glyma12g09640 | Glyma12g09640.2    | Gm12:7398088-7398957      | 212         | 2       |
| Gmcupin12.3  | Glyma12g09760 | Glyma12g09760.2    | Gm12:7531728-7532351      | 207         | 1       |
| Gmcupin12.4  | Glyma12g31110 | Glyma12g31110.1    | Gm12:34711894-34712517    | 207         | 1       |
| Gmcupin13.1  | Glyma13g16960 | Glyma13g16960.2    | Gm13:20815056-20816399    | 199         | 2       |
| Gmcupin13.2  | Glyma13g18450 | Glyma13g18450.2    | Gm13: 22109247 - 22113254 | 226         | 4       |
| Gmcupin13.3  | Glyma13g22050 | Glyma13g22050.1    | Gm13:25624544-25624397    | 239         | 2       |
| Gmcupin13.4  | Glyma13g40360 | Glyma13g40360.1    | Gm13:40856942-40859117    | 483         | 5       |
| Gmcupin15.1  | Glyma15g05040 | Glyma15g05040.2    | Gm15: 3611464 - 3613757   | 351         | 7       |
| Gmcupin15.2  | Glyma15g13960 | Glyma15g13960.1    | Gm15:10534152-10533514    | 215         | 2       |
| Gmcupin15.3  | Glyma15g19510 | Glyma15g19510.1    | Gm15:16833879-16835243    | 213         | 1       |
| Gmcupin15.4  | Glyma15g35130 | Glyma15g35130.1    | Gm15:39672342-39673419    | 231         | 1       |
| Gmcupin16.1  | Glyma16g00980 | Glyma16g00980.1    | Gm16:652712-653968        | 209         | 1       |
| Gmcupin16.2  | Glyma16g00990 | Glyma16g00990.1    | Gm16:656546-657171        | 181         | 2       |
| Gmcupin16.3  | Glyma16g01000 | Glyma16g01000.1    | Gm16:660570-661190        | 206         | 1       |
| Gmcupin16.4  | Glyma16g06500 | Glyma16g06500.1    | Gm16:5853241-5853122      | 221         | 2       |
| Gmcupin16.5  | Glyma16g06520 | Glyma16g06520.1    | Gm16:5858235-5858104      | 221         | 2       |
| Gmcupin16.6  | Glyma16g06530 | Glyma16g06530.1    | Gm16:5860996-5862104      | 220         | 2       |
| Gmcupin16.7  | Glyma16g06630 | Glyma16g06630.1    | Gm16:5947078-5946961      | 221         | 2       |
| Gmcupin16.8  | Glyma16g06640 | Glyma16g06640.1    | Gm16:5951136-5952363      | 215         | 2       |
| Gmcupin16.9  | Glyma16g07550 | Glyma16g07550.1    | Gm16:6838751-6839383      | 210         | 1       |
| Gmcupin16.10 | Glyma16g07560 | Glyma16g07560.2    | Gm16:6844140-6843743      | 188         | 1       |
| Gmcupin16.11 | Glyma16g07580 | Glyma16g07580.1    | Gm16:6860067-6860840      | 214         | 1       |
| Gmcupin17.1  | Glyma17g05760 | Glyma17g05760.1    | Gm17:4052453-4053577      | 208         | 1       |

Table 1. Cont.

| Gene Symbol  | Gene Locus    | Primary transcript | Gene location             | Amino Acids | Extrons |
|--------------|---------------|--------------------|---------------------------|-------------|---------|
| Gmcupin19.1  | Glyma19g09370 | Glyma19g09370.2    | Gm19:11189789-11189486    | 181         | 3       |
| Gmcupin19.2  | Glyma19g09810 | Glyma19g09810.1    | Gm19:11530120-11531183    | 221         | 2       |
| Gmcupin19.3  | Glyma19g09830 | Glyma19g09830.1    | Gm19:11554699-11555709    | 221         | 2       |
| Gmcupin19.4  | Glyma19g09840 | Glyma19g09840.1    | Gm19:11601504-11602281    | 221         | 2       |
| Gmcupin19.5  | Glyma19g09860 | Glyma19g09860.1    | Gm19:11630024-11631147    | 221         | 2       |
| Gmcupin19.6  | Glyma19g09990 | Glyma19g09990.1    | Gm19:11922733-11922620    | 221         | 2       |
| Gmcupin19.7  | Glyma19g24840 | Glyma19g24840.1    | Gm19:30509520-30510472    | 212         | 2       |
| Gmcupin19.8  | Glyma19g24850 | Glyma19g24850.1    | Gm19:30514099-30513955    | 221         | 2       |
| Gmcupin19.9  | Glyma19g24870 | Glyma19g24870.2    | Gm19:30532519-30533617    | 221         | 2       |
| Gmcupin19.10 | Glyma19g24900 | Glyma19g24900.1    | Gm19:30559228-30560036    | 221         | 2       |
| Gmcupin19.11 | Glyma19g24910 | Glyma19g24910.1    | Gm19:30576453-30577383    | 219         | 2       |
| Gmcupin19.12 | Glyma19g27580 | Glyma19g27580.1    | Gm19:34882234-34884637    | 212         | 2       |
| Gmcupin19.13 | Glyma19g34780 | Glyma19g34780.1    | Gm19: 42366324 - 42369290 | 481         | 4       |
| Gmcupin19.14 | Glyma19g41070 | Glyma19g41070.2    | Gm19:47390045 - 47391131  | 184         | 3       |
| Gmcupin19.15 | Glyma19g41220 | Glyma19g41220.1    | Gm19:47524955-47524382    | 219         | 2       |
| Gmcupin20.1  | Glyma20g22180 | Glyma20g22180.1    | Gm20:32106832-32105935    | 224         | 2       |
| Gmcupin20.2  | Glyma20g25430 | Glyma20g25430.1    | Gm20:35111115-35111738    | 207         | 1       |
| Gmcupin20.3  | Glyma20g36300 | Glyma20g36300.1    | Gm20:44453211-44454264    | 232         | 2       |
| Gmcupin20.4  | Glyma20g36320 | Glyma20g36320.1    | Gm20:44458621-44459718    | 222         | 2       |

doi:10.1371/journal.pone.0110092.t001

ment and during maturity of early and late cultivars. All these demonstrated that GLPs may involve in certain developmental stages in plants.

Expression of Cupin proteins could be modulated by abiotic or biotic stresses, suggesting their multifunctional roles in plant defense response. For instance, a 66-kDa cupin protein BspA (for “boiling-stable protein”), highly expressed in cultured shoots of aspen (*Populus tremula*) in the presence of water stress, was considered to contribute to membrane stability [16]. However, the mechanism of how cupin proteins involve in the plant defense is still not well defined. One germin-like gene (*ChGLP*) cloned from geminivirus-resistant pepper, induced by ethylene and salicylic acid other than jasmonic acid, encoded an enzyme with manganese superoxide dismutase (Mn-SOD) activity [17]. Also, Mn-SOD activity was identified in GLPs isolated from tobacco and *Barbula unguiculata* [18–20]. Considering plant Mn-SODs was distributed extracellularly as well as in mitochondria and peroxisomes and associated with defense against biotic stress in plants [18,21,22], it is probably to speculate that Cupin protein may involve in the plant defense through scavenging free radicals.

The ubiquitous distribution of GLPs implies their indispensable and fundamental roles in plants [23,24]. In soybean, rare studies have been performed on the functional characterization of Cupin proteins [25]. Completion of the soybean genome greatly facilitated the identification of gene families at the whole-genome level [26]. In the present study, a genome-wide identification of Cupin domain was performed in soybean, and detailed analysis of the sequence phylogeny, genome organization, gene structure, expression profiling and selective effects of *Gmcupin* genes during soybean domestication was performed. Our data contributes to the evolutionary and functional analysis of the *Cupin* gene family in soybean.

## Materials and Methods

### Sequence retrieval and phylogenetic analysis

Amino-acid sequence of the Cupin domain was used to search for potential Dof-domain homolog hits in the whole-genome sequence of *Glycine max* with BLASTP at the Phytozome database (<http://www.phytozome.net>) [27]. All non-redundant hits with expected values of  $<1E-5$  were collected. Subsequently, manual analysis was performed to confirm the presence of Cupin domain using InterProScan program (<http://www.ebi.ac.uk/Tools/InterProScan/>) [28].

Sequence alignments of the full-length protein sequences were performed using Clustal X software (version 1.8) [29]. Phylogenetic trees were constructed with MEGA 5.0 using Neighbor-Joining (NJ) method with 1000 replicates of bootstrap analysis [30]. The evolutionary distances were computed using the p-distance method. WebLogo was used to create the distribution of amino-acid residues at the corresponding positions in domain profiles for the conserved Cupin domain of Gmcupins [28].

### Identification of conserved motifs

For the motif analysis, deduced amino-acid sequences of the Gmcupins were analyzed by Multiple EM for Motif Elicitation version 4.9.1 (<http://meme.nbcr.net/meme/cgi-bin/meme.cgi>) [31]. Structural motif annotation was performed using the Pfam (<http://pfam.sanger.ac.uk>), NCBI (<http://www.ncbi.nlm.nih.gov/>) and SMART (<http://smart.embl-heidelberg.de>) database.

### Genomic structure and chromosomal location of *Gmcupins*

The exon/intron organization for individual cupin gene was illustrated with Gene structure display server program (GSDS) (<http://gsds.cbi.pku.edu.cn/>) [32] by comparing the cDNAs with their corresponding gDNA sequences in the Phytozome database

(<http://www.phytozome.net/gmax>). The chromosomal locations of soybean cupins were mapped to the duplicated blocks using the Chromosome Visualization Tool (CViT) genome search and synteny viewer at the Legume Information System (<http://comparative-legumes.org/>) [33,34].

### Calculation of Ka/Ks values

Clustal X (version 1.8) was used for the pairwise alignments of the paralogous nucleotide sequences [29]. Ka (non-synonymous substitution rate) and Ks (synonymous substitution rate) were estimated using the DnaSp v5 program [35]. Divergence time (T) was calculated using as the formula:  $T = Ks/2\lambda$ , where the synonymous mutation rate  $\lambda$  was  $6.1 \times 10^{-9}$  for soybean [26,36,37].

### Expression analysis of *GmCupin* genes

Genome-wide transcriptome data of seeds during various developmental stages were downloaded from Soybase database (<http://soybase.org/>). The transcript data were obtained from vegetative tissues (e.g. young leaf, root and nodule), seed of seven developmental stages (10, 14, 21, 25, 28, 35, and 42 days after flowering), and reproductive tissues (e.g. flower, one cm pod, pod shell of 10 and 14 days after flowering). All transcript data were analyzed with Cluster 3.0 [38] and the heat map was viewed in Java Treeview [39].

### Evolutionary analysis of *GmCupin* genes

Single nucleotide polymorphisms (SNPs) of the *GmCupin* genes were downloaded from the SoyKB database (<http://soykb.org/>) based on the resequencing of wild and cultivated soybean genomes [40]. The ratio of each SNP in wild and cultivated soybean populations was analyzed respectively. The SNP site with reverse distribution ratio in different types of soybean population was defined as a putative selective site throughout domestication.

## Results and Discussion

### Identification of *Cupin* gene family in soybean

In order to identify the *Cupin* gene family in soybean genome, BLASTP was performed against the *G. max* v1.1 genome using the conserved Cupin domain. Afterwards, the obtained sequences were used as secondary queries. A total of 69 non-redundant *Cupin* genes were identified in the soybean genome (Table 1). To identify the conserved Cupin domain, all candidates were subjected to functional analysis using InterProScan program (<http://www.ebi.ac.uk/Tools/InterProScan/>). Soybean *Cupin* genes were numbered from *GmCupin01.1* to *GmCupin 20.4* according to their localization on chromosomes. Peptides consisted of 125–495 (average 224) amino acids were encoded by the identified *GmCupin* genes in soybean.

Multiple alignment analysis was performed to discover the features of the homologous domain sequence and the frequency of

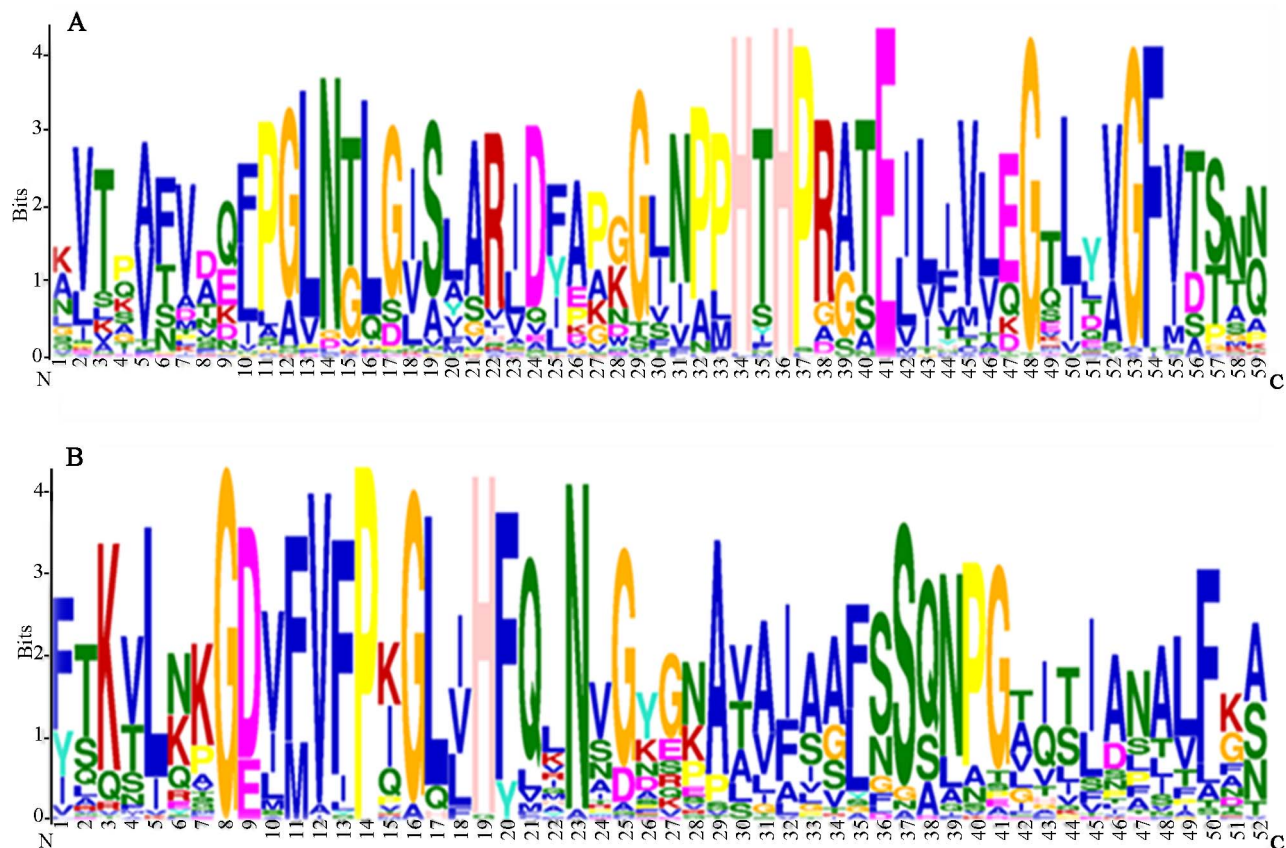

**Figure 1. Conserved domains across cupin proteins in soybean.** The sequence logos are based on alignments of 69 *GmCupin* domains. Multiple alignment analysis of all typical *GmCupin* domains (A: *GmCupin 1*; B: *GmCupin 2*) were performed with Clustal W. The bit score indicates the information content for each position in the sequence. doi:10.1371/journal.pone.0110092.g001

the amino-acids at each position of the Gmcupin domains. Multiple EM for Motif Elicitation was used to identify the putative cupin motif. Two conserved domains, designated as Gmcupin 1 and Gmcupin 2, were found in these Gmcupins, and were formed by 59 amino acids and 52 amino acids, respectively. In Gmcupin 1, seven highly conserved residues were identified, including H-34, H-36, P-37, E-41, Gly-48, Gly-53 and F-54. In Gmcupin 2, four conserved residues were identified such as Gly-8, P-14, H-19 and N-23 (Figure 1). In the previous reports, the histidines and glutamic acid(s) have been reported to act as ligands for the active-site metal [18,19,41]. Additionally, studies showed that a set of conserved histidine residues employed in sugar-binding in the ancestral non-enzymatic domain evolved into the metal-coordinating histidine residues in oxalate oxidase [42] and oxalate decarboxylase [43].

### Phylogenetic relationships and gene structure of soybean *Cupin* genes

The abundance of *Gmcupin* genes may derive from multiple gene duplication events, which was represented by a whole-genome duplication following multiple segmental and tandem duplications [44]. In this study, an unrooted tree was constructed to examine the phylogenetic relationships among the Cupin domains using alignments of the full-length amino-acid sequences in all Gmcupin proteins (Figure 2). The *Gmcupin* gene family was classified into ten subgroups (I-X) with 2-22 members in each subgroup. The very high bootstrap value in each subgroup suggested a common origin for the *Gmcupin* gene in each group except subgroup I. Surprisingly, 12 *Gmcupin* genes (80%) on chromosome 19 were classified into subgroup I with five genes (*Gmcupin19.2*, *Gmcupin19.3*, *Gmcupin19.4*, *Gmcupin19.5* and *Gmcupin19.6*) showed the same base composition. Phylogenetic

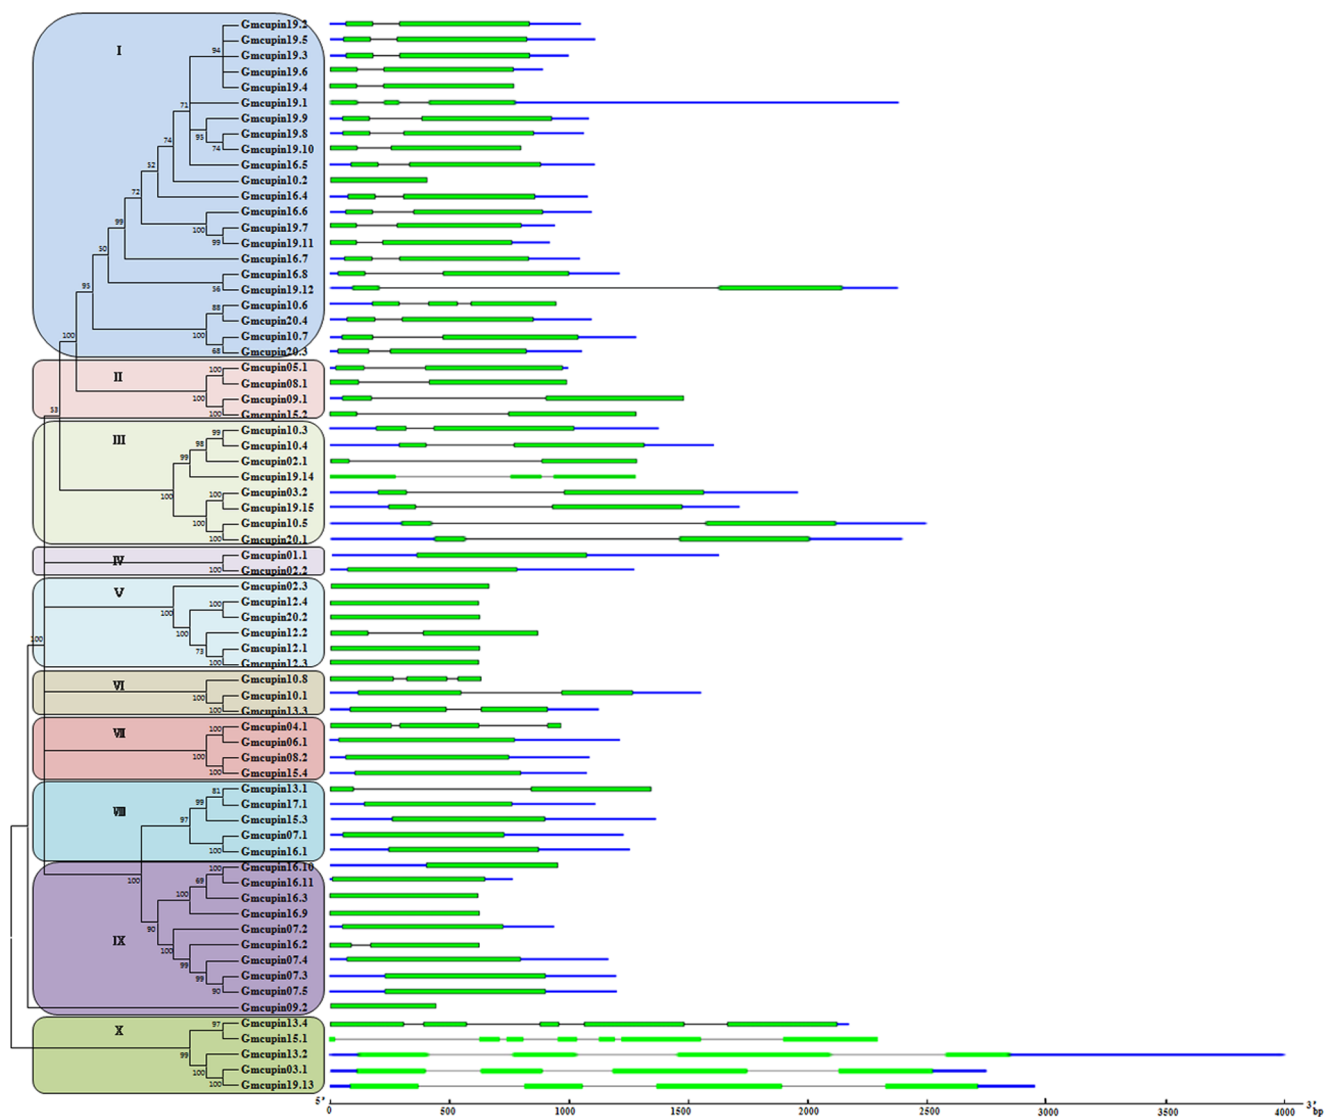

**Figure 2. Phylogenetic relationships and gene structure of Gmcupin genes.** The phylogenetic tree of Gmcupin proteins constructed from a complete alignment of 69 Gmcupin proteins using MEGA 5.0 by the neighbor-joining method. The bootstrap consensus tree inferred from 1000 replicates is taken to represent the evolutionary history of the taxa analyzed. Percentage bootstrap scores of >50% are indicated on the nodes. Ten major phylogenetic subgroups (designated as I to X) are indicated. Exons of *Gmcupin* genes are represented by green boxes and introns and untranslated region (UTR) by black and blue lines. The sizes of exons and introns can be estimated using the scale below.  
doi:10.1371/journal.pone.0110092.g002

tree topology revealed that 22 *Gm*cupin pairs located at the terminal nodes shared high similarities. Thus, they were assigned as paralogous pairs (homologous genes that diverged by gene duplication, Figure 2). These paralogous pairs of *Gm*cupin genes, accounted for more than 63% of the entire *Gm*cupin family, and showed a sequence similarity of 77.2%~100% (Table S1). This implied that these genes may evolve from a recent soybean genome duplication event [45].

As gene structural diversity is a possible explanation to the evolution of multigene families, the exon/intron organization in the coding sequences of each *Gm*cupin gene was compared. According to their predicted structures, extremely similar gene structures were observed in most of the closely related *Gm*cupin members within the same. In addition, the position and length of intron were almost completely conserved (Fig. 2A). For instance, most of the *Gm*cupin genes in subgroup I, II and III contained one intron respectively, except *Gm*cupin 19.4, *Gm*cupin 10.2, *Gm*cupin 10.6 in subgroup I and *Gm*cupin 19.14 in subgroup III. Meanwhile, no introns were identified in 23 of the *Gm*cupin genes (23/30) in subgroup IV, V, VI, VII, VIII and IV, respectively. In contrast, the gene structures in *Gm*cupin subfamily X appeared to be more variable and displayed the largest number of exon/intron structure variants compared with the other *Gm*cupin genes. The dissimilarity of intron phases between subfamilies and the conservation within *Gm*cupin subfamilies

may reciprocally support to the results of phylogenetic analysis and genome duplication.

### Chromosomal location and duplication of soybean *Cupin* genes

As revealed in Figure 3, *Gm*cupin genes were non-randomly distributed on 17 of the 20 chromosomes. Fifteen *Cupin* genes were localized on chromosome 19, while eleven genes were localized on chromosome 16. In contrast, no more than two *Gm*cupins genes were localized on eleven chromosomes. What's more, no *Cupin* genes were distributed on chromosome 11, 14 and 18, respectively. Most *Gm*cupins presented substantial clustering on several chromosomes especially on those with high densities of the genes. To be exact, 10 *Gm*cupin genes on chromosome 16 were arranged in four clusters, with each in less than 9-kb (*Gm*cupin16.1, *Gm*cupin16.2, and *Gm*cupin16.3 located within 8.5-kb; *Gm*cupin16.4, *Gm*cupin16.5 and *Gm*cupin16.6 located within 8.8-kb; *Gm*cupin16.7 and *Gm*cupin16.8 located within 5.3-kb; *Gm*cupin16.9 and *Gm*cupin16.10 located within 5-kb), the other *Gm*cupin gene *Gm*cupin16.11 is also close to its neighbor *Gm*cupin16.10 within a 1.7-kb segment. Similarly, *Gm*cupin19.7 and *Gm*cupin19.8 located within a 4.5-kb segment, while *Gm*cupin19.10 and *Gm*cupin19.11 located within a 19-kb segment on the same chromosome.

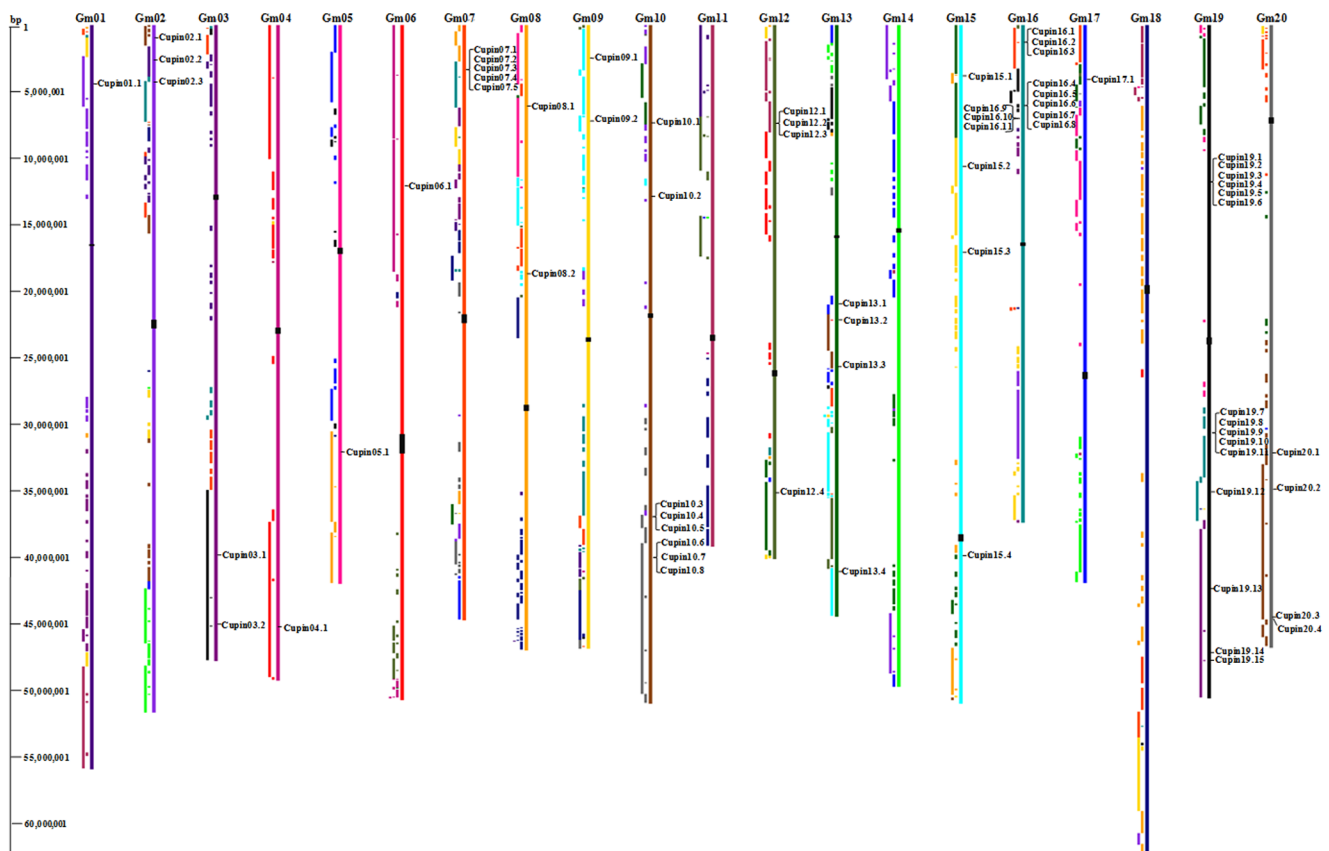

**Figure 3. Chromosomal locations and predicted clusters for *Gm*Cupin genes.** The schematic diagram of genome-wide chromosome organization and segmental duplication arising from the genome duplication event in soybean was derived from the CVIT genome search and synteny viewer at the Legume Information System (<http://comparative-legumes.org>). The chromosomal positions of all *Gm*cupin genes were mapped on each chromosome. Colored blocks to the left of each chromosome show duplications with chromosomes of the same color. The chromosome numbers are indicated at the top of each bar and sizes of chromosomes are represented by the vertical scale. The locations of centromeric repeats are shown as black rectangles over the chromosomes.

doi:10.1371/journal.pone.0110092.g003

**Table 2.** Duplicated Cupin genes in soybean and the dates of the duplication blocks.

| Gene1        | Gene2        | Duplication   | Fragment size | Ka     | Ks     | Ka/Ks  | Date(Mya) |
|--------------|--------------|---------------|---------------|--------|--------|--------|-----------|
| Gmcupin5.1   | Gmcupin8.1   | Fragment      | Large         | 0.0370 | 0.1177 | 0.3144 | 9.65      |
| Gmcupin9.1   | Gmcupin15.1  | Fragment      | Large         | 0.0328 | 0.1441 | 0.2276 | 11.81     |
| Gmcupin3.1   | Gmcupin19.13 | Fragment      | Large         | 0.0576 | 0.1479 | 0.3895 | 12.12     |
| Gmcupin10.5  | Gmcupin20.1  | Fragment      | Small         | 0.0181 | 0.1073 | 0.1687 | 8.80      |
| Gmcupin1.1   | Gmcupin2.2   | Fragment      | Large         | 0.0161 | 0.1972 | 0.0816 | 16.16     |
| Gmcupin10.1  | Gmcupin13.3  | Fragment      | Large         | 0.0457 | 0.1493 | 0.3061 | 12.24     |
| Gmcupin13.1  | Gmcupin17.1  | Fragment      | Small         | 0.1186 | 0.1838 | 0.6453 | 15.07     |
| Gmcupin7.1   | Gmcupin16.1  | Fragment      | Large         | 0.0173 | 0.1582 | 0.1094 | 12.97     |
| Gmcupin16.2  | Gmcupin7.4   | Fragment      | Large         | 0.0404 | 0.1916 | 0.2109 | 15.70     |
| Gmcupin4.1   | Gmcupin6.1   | Fragment      | Large         | 0.1079 | 0.2469 | 0.4370 | 20.24     |
| Gmcupin8.2   | Gmcupin15.4  | Fragment      | Small         | 0.0290 | 0.0965 | 0.3005 | 7.91      |
| Gmcupin10.7  | Gmcupin20.3  | Fragment      | Large         | 0.0270 | 0.1925 | 0.1403 | 15.78     |
| Gmcupin10.6  | Gmcupin20.4  | Fragment      | Large         | 0.0330 | 0.1511 | 0.2184 | 12.39     |
| Gmcupin16.8  | Gmcupin19.12 | Fragment      | Small         | 0.2215 | 0.3497 | 0.6334 | 28.66     |
| Gmcupin19.13 | Gmcupin3.1   | Fragment      | Large         | 0.0576 | 0.1479 | 0.3895 | 12.12     |
| Gmcupin13.4  | Gmcupin15.1  | Fragment      | Large         | 0.0658 | 0.1742 | 0.3777 | 14.28     |
| Gmcupin19.15 | Gmcupin3.2   | Fragment      | Large         | 0.0239 | 0.1799 | 0.1329 | 14.75     |
| Gmcupin10.3  | Gmcupin10.4  | Tandem Repeat | Large         | 0.0351 | 0.0909 | 0.3861 | 7.45      |

doi:10.1371/journal.pone.0110092.t002

|               | young_ |        | pod    |       | pod   |       | seed | seed | seed | seed | seed  | seed  | seed | root | nodule |
|---------------|--------|--------|--------|-------|-------|-------|------|------|------|------|-------|-------|------|------|--------|
|               | leaf   | flower | one cm | shell | shell | 10DAF |      |      |      |      |       |       |      |      |        |
| Gm cupin01.1  | 0      | 1      | 0      | 0     | 1     | 0     | 0    | 0    | 0    | 0    | 0     | 0     | 0    | 6    | 0      |
| Gm cupin02.2  | 1      | 2      | 3      | 1     | 0     | 0     | 0    | 0    | 0    | 0    | 0     | 0     | 0    | 2    | 0      |
| Gm cupin02.3  | 6      | 5      | 2      | 4     | 8     | 0     | 1    | 3    | 2    | 1    | 4     | 0     | 0    | 0    | 0      |
| Gm cupin03.1  | 0      | 0      | 0      | 0     | 0     | 0     | 0    | 1    | 3072 | 5909 | 23378 | 30041 | 0    | 0    | 0      |
| Gm cupin03.2  | 9      | 11     | 3      | 3     | 4     | 2     | 3    | 4    | 2    | 1    | 4     | 1     | 62   | 9    | 0      |
| Gm cupin04.1  | 0      | 0      | 0      | 0     | 0     | 0     | 0    | 0    | 0    | 0    | 0     | 0     | 0    | 0    | 0      |
| Gm cupin05.1  | 0      | 0      | 0      | 0     | 0     | 0     | 0    | 0    | 0    | 0    | 0     | 0     | 0    | 0    | 0      |
| Gm cupin06.1  | 0      | 0      | 0      | 1     | 0     | 0     | 0    | 0    | 0    | 0    | 0     | 0     | 3    | 0    | 0      |
| Gm cupin07.1  | 17     | 1      | 0      | 1     | 1     | 0     | 0    | 0    | 0    | 0    | 1     | 3     | 1    | 0    | 0      |
| Gm cupin07.2  | 0      | 0      | 0      | 0     | 0     | 0     | 0    | 0    | 0    | 0    | 0     | 0     | 0    | 12   | 0      |
| Gm cupin07.3  | 0      | 0      | 0      | 0     | 0     | 0     | 0    | 0    | 0    | 0    | 0     | 0     | 0    | 0    | 0      |
| Gm cupin07.4  | 0      | 0      | 0      | 0     | 0     | 0     | 0    | 0    | 0    | 0    | 0     | 0     | 0    | 1    | 0      |
| Gm cupin07.5  | 0      | 0      | 0      | 0     | 0     | 0     | 0    | 0    | 0    | 0    | 0     | 0     | 0    | 0    | 0      |
| Gm cupin08.1  | 0      | 0      | 0      | 0     | 0     | 0     | 0    | 0    | 0    | 0    | 0     | 0     | 0    | 0    | 0      |
| Gm cupin08.2  | 0      | 2      | 1      | 0     | 0     | 0     | 0    | 0    | 0    | 0    | 0     | 0     | 0    | 2    | 0      |
| Gm cupin09.1  | 0      | 0      | 0      | 0     | 0     | 0     | 0    | 0    | 0    | 0    | 0     | 0     | 0    | 0    | 0      |
| Gm cupin09.2  | 12     | 0      | 0      | 2     | 1     | 0     | 0    | 1    | 0    | 0    | 0     | 0     | 0    | 0    | 0      |
| Gm cupin10.1  | 4      | 1      | 1      | 2     | 2     | 1     | 1    | 0    | 1    | 1    | 3     | 1     | 13   | 0    | 0      |
| Gm cupin10.3  | 1      | 2      | 0      | 1     | 1     | 0     | 0    | 0    | 0    | 0    | 0     | 0     | 5    | 2    | 0      |
| Gm cupin10.4  | 1      | 2      | 1      | 1     | 11    | 0     | 0    | 0    | 0    | 0    | 0     | 0     | 10   | 2    | 0      |
| Gm cupin10.5  | 0      | 0      | 0      | 0     | 1     | 0     | 0    | 0    | 0    | 0    | 0     | 0     | 1    | 1    | 0      |
| Gm cupin10.6  | 0      | 0      | 0      | 0     | 0     | 0     | 0    | 0    | 0    | 0    | 0     | 0     | 0    | 0    | 0      |
| Gm cupin10.7  | 0      | 0      | 0      | 0     | 0     | 0     | 0    | 0    | 0    | 0    | 0     | 0     | 13   | 0    | 0      |
| Gm cupin12.1  | 0      | 0      | 0      | 0     | 0     | 0     | 0    | 0    | 0    | 0    | 0     | 0     | 0    | 0    | 0      |
| Gm cupin12.2  | 0      | 0      | 0      | 0     | 0     | 0     | 0    | 0    | 0    | 0    | 0     | 0     | 0    | 0    | 0      |
| Gm cupin12.3  | 0      | 0      | 0      | 0     | 0     | 0     | 0    | 0    | 0    | 0    | 0     | 0     | 0    | 0    | 0      |
| Gm cupin12.4  | 0      | 0      | 0      | 0     | 0     | 0     | 0    | 0    | 0    | 0    | 0     | 0     | 0    | 0    | 0      |
| Gm cupin13.1  | 4      | 0      | 1      | 0     | 0     | 0     | 0    | 0    | 0    | 0    | 0     | 0     | 0    | 0    | 0      |
| Gm cupin13.2  | 0      | 0      | 0      | 0     | 0     | 0     | 0    | 0    | 703  | 1494 | 10794 | 18772 | 0    | 0    | 0      |
| Gm cupin13.3  | 3      | 2      | 1      | 1     | 0     | 0     | 0    | 1    | 0    | 0    | 1     | 1     | 6    | 3    | 0      |
| Gm cupin13.4  | 0      | 0      | 0      | 0     | 0     | 0     | 0    | 0    | 0    | 0    | 0     | 0     | 0    | 0    | 0      |
| Gm cupin15.1  | 0      | 0      | 0      | 0     | 0     | 0     | 0    | 0    | 0    | 0    | 0     | 0     | 0    | 0    | 0      |
| Gm cupin15.2  | 0      | 0      | 0      | 0     | 0     | 0     | 0    | 0    | 0    | 0    | 0     | 0     | 0    | 0    | 0      |
| Gm cupin15.3  | 332    | 27     | 69     | 69    | 60    | 16    | 8    | 7    | 15   | 8    | 7     | 0     | 0    | 1    | 0      |
| Gm cupin15.4  | 0      | 0      | 0      | 0     | 0     | 0     | 0    | 0    | 0    | 0    | 0     | 0     | 2    | 0    | 0      |
| Gm cupin16.1  | 63     | 0      | 0      | 0     | 2     | 0     | 0    | 1    | 1    | 1    | 1     | 1     | 0    | 0    | 0      |
| Gm cupin16.2  | 0      | 0      | 0      | 0     | 0     | 0     | 0    | 0    | 0    | 0    | 0     | 0     | 0    | 0    | 0      |
| Gm cupin16.3  | 0      | 0      | 0      | 0     | 0     | 0     | 0    | 1    | 0    | 0    | 0     | 0     | 0    | 0    | 0      |
| Gm cupin16.4  | 0      | 0      | 0      | 0     | 0     | 0     | 0    | 0    | 0    | 0    | 0     | 0     | 14   | 1    | 0      |
| Gm cupin16.5  | 0      | 0      | 0      | 0     | 0     | 0     | 0    | 0    | 0    | 0    | 0     | 0     | 78   | 4    | 0      |
| Gm cupin16.6  | 0      | 0      | 0      | 0     | 0     | 0     | 0    | 0    | 0    | 0    | 0     | 0     | 12   | 0    | 0      |
| Gm cupin16.7  | 0      | 0      | 0      | 0     | 0     | 0     | 0    | 0    | 0    | 0    | 0     | 0     | 0    | 0    | 0      |
| Gm cupin16.8  | 52     | 42     | 219    | 150   | 101   | 0     | 0    | 0    | 0    | 0    | 0     | 0     | 0    | 0    | 0      |
| Gm cupin16.9  | 0      | 0      | 0      | 0     | 0     | 0     | 0    | 0    | 0    | 0    | 0     | 0     | 0    | 0    | 0      |
| Gm cupin16.10 | 0      | 0      | 0      | 0     | 0     | 0     | 0    | 0    | 0    | 0    | 0     | 0     | 0    | 0    | 0      |
| Gm cupin16.11 | 0      | 0      | 0      | 0     | 0     | 0     | 0    | 0    | 0    | 0    | 0     | 0     | 0    | 0    | 0      |
| Gm cupin17.1  | 796    | 20     | 80     | 111   | 92    | 8     | 10   | 14   | 2    | 1    | 1     | 0     | 1    | 7    | 0      |
| Gm cupin19.1  | 0      | 0      | 0      | 0     | 0     | 0     | 0    | 0    | 0    | 0    | 0     | 0     | 0    | 0    | 0      |
| Gm cupin19.2  | 0      | 0      | 0      | 0     | 0     | 0     | 0    | 0    | 0    | 0    | 0     | 0     | 0    | 0    | 0      |
| Gm cupin19.3  | 0      | 0      | 0      | 0     | 0     | 0     | 0    | 0    | 0    | 0    | 0     | 0     | 0    | 0    | 0      |
| Gm cupin19.4  | 0      | 0      | 0      | 0     | 0     | 0     | 0    | 0    | 0    | 0    | 0     | 0     | 0    | 0    | 0      |
| Gm cupin19.5  | 0      | 0      | 0      | 0     | 0     | 0     | 0    | 0    | 0    | 0    | 0     | 0     | 0    | 0    | 0      |
| Gm cupin19.6  | 0      | 0      | 0      | 0     | 0     | 0     | 0    | 0    | 0    | 0    | 0     | 0     | 0    | 0    | 0      |
| Gm cupin19.7  | 0      | 0      | 0      | 0     | 0     | 0     | 0    | 0    | 0    | 0    | 0     | 0     | 0    | 0    | 0      |
| Gm cupin19.8  | 0      | 0      | 0      | 0     | 0     | 0     | 0    | 0    | 0    | 0    | 0     | 0     | 0    | 0    | 0      |
| Gm cupin19.9  | 0      | 0      | 0      | 0     | 0     | 0     | 0    | 0    | 0    | 0    | 0     | 0     | 0    | 0    | 0      |
| Gm cupin19.10 | 0      | 0      | 0      | 0     | 0     | 0     | 0    | 0    | 0    | 0    | 0     | 0     | 0    | 0    | 0      |
| Gm cupin19.11 | 0      | 0      | 0      | 0     | 0     | 0     | 0    | 0    | 0    | 0    | 0     | 0     | 0    | 0    | 0      |
| Gm cupin19.12 | 1      | 8      | 25     | 26    | 22    | 0     | 0    | 0    | 0    | 0    | 0     | 0     | 0    | 0    | 0      |
| Gm cupin19.13 | 0      | 0      | 0      | 0     | 0     | 0     | 0    | 0    | 80   | 158  | 885   | 1314  | 0    | 0    | 0      |
| Gm cupin19.14 | 0      | 0      | 0      | 0     | 0     | 0     | 0    | 0    | 0    | 0    | 0     | 0     | 0    | 0    | 0      |
| Gm cupin19.15 | 1      | 3      | 4      | 4     | 5     | 1     | 1    | 2    | 4    | 2    | 4     | 2     | 5    | 4    | 0      |
| Gm cupin20.1  | 1      | 0      | 0      | 1     | 2     | 0     | 0    | 0    | 0    | 0    | 0     | 0     | 2    | 0    | 0      |
| Gm cupin20.2  | 0      | 2      | 0      | 2     | 1     | 0     | 2    | 1    | 2    | 1    | 3     | 2     | 0    | 1    | 0      |
| Gm cupin20.3  | 0      | 0      | 0      | 0     | 0     | 0     | 0    | 0    | 0    | 0    | 0     | 0     | 2    | 0    | 0      |
| Gm cupin20.4  | 0      | 1      | 0      | 0     | 0     | 0     | 0    | 0    | 0    | 0    | 0     | 0     | 61   | 1    | 0      |

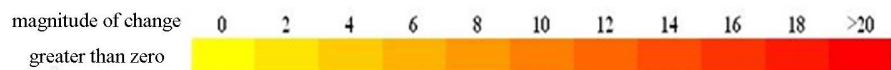



**Figure 4. Expression profile of *Gmcupin* genes in different tissues.** The numbers in the expression profile are normalized data, which were calculated as reads/kilobase/million normalization of the raw data. All data were downloaded from the SoyBase. doi:10.1371/journal.pone.01110092.g004

Soybean genome is speculated to undergo at least two rounds of genome-wide duplication followed by multiple segmental duplication, tandem duplication, transposition events (e.g. retroposition and replicative transposition) [45]. A tandem duplication event was confirmed by the presence of two or more genes on the same chromosome, while a segmental duplication event was defined as gene duplication on different chromosomes [46]. To our knowledge, the major causes for gene-family expansion were segmental duplication, tandem duplication, and transposition events. To reveal the potential relationship between putative paralogous pairs of *Gmcupin* genes and segmental duplications, CVIT genome search and synteny viewer (<http://comparative-legumes.org/>) were used to map the *Gmcupin* genes [33]. The distributions of *Gmcupin* genes relative to the corresponding duplicate blocks were illustrated in Figure 3. Within the identified duplicated blocks associated with a duplication event, about 18 (81.8%) of *Gmcupins* were preferentially retained duplicates that located in duplicated regions, with 13 putative paralogous pairs located in a segmental duplication of a long fragment (>1 Mb) and 4 located in a segmental duplication of a short fragment (< 1 Mb, Table 2). Meanwhile, another putative paralogous pairs (*Gmcupin10.3/Gmcupin10.4*) were formed, which was supposed to be possibly due to tandem duplication in the same orientation. Taken together, we implied that long segmental duplication was predominant for evolution of *Gmcupin* genes, which may be associated with tandem duplication.

To investigate whether Darwinian positive selection is involved in the divergence of *Gmcupin* genes after duplication and trace the

dates of the duplication blocks, the substitution rate ratios (Ka/Ks) of 18 paralogous pairs are calculated using DnaSP program. Ks was used to calculate the approximate dates of duplication events. The segmental duplications of the *Gmcupin* genes in soybean was supposed to originate from 7.45 Mya (million years ago, Ks = 0.0909) to 28.66 Mya (Ks = 0.3497), with a mean value of 13.78 Mya (Ks = 0.1682, Table 2). Meanwhile, the Ks of tandem duplication of *Gmcupin10.3* and *Gmcupin10.4* was 0.0909, dating the duplication event at 7.45 Mya. Considering the fact that the soybean genome underwent two polyploidy events at 13 and 58 Mya, all the segmental duplications of the *Gmcupin* genes occurred around 13 Mya when *Glycine*-specific duplication occurred in the soybean genome [26].

Generally, a Ka/Ks of less than 1 demonstrates a functional constraint with purifying or negative selection of the genes. In this study, The Ka/Ks ratios of 8 segmental duplication pairs were less than 0.3, while the ratios of the other 9 segmental duplication pairs and one tandem duplication pair were more than 0.3, which demonstrated a possibility of significant functional divergence of some *Gmcupin* genes after the duplication events. The Ka/Ks ratios of another two paralogous gene pair (*Gmcupin16.8/19.12* and *Gmcupin13.1/17.1*) were slightly larger than 0.5 (Table 2). This suggests that they experience relatively rapid evolution following duplication. On this basis, we concluded that *Gmcupin* gene family experienced strong purifying selection pressure with limited functional divergence after segmental duplications.

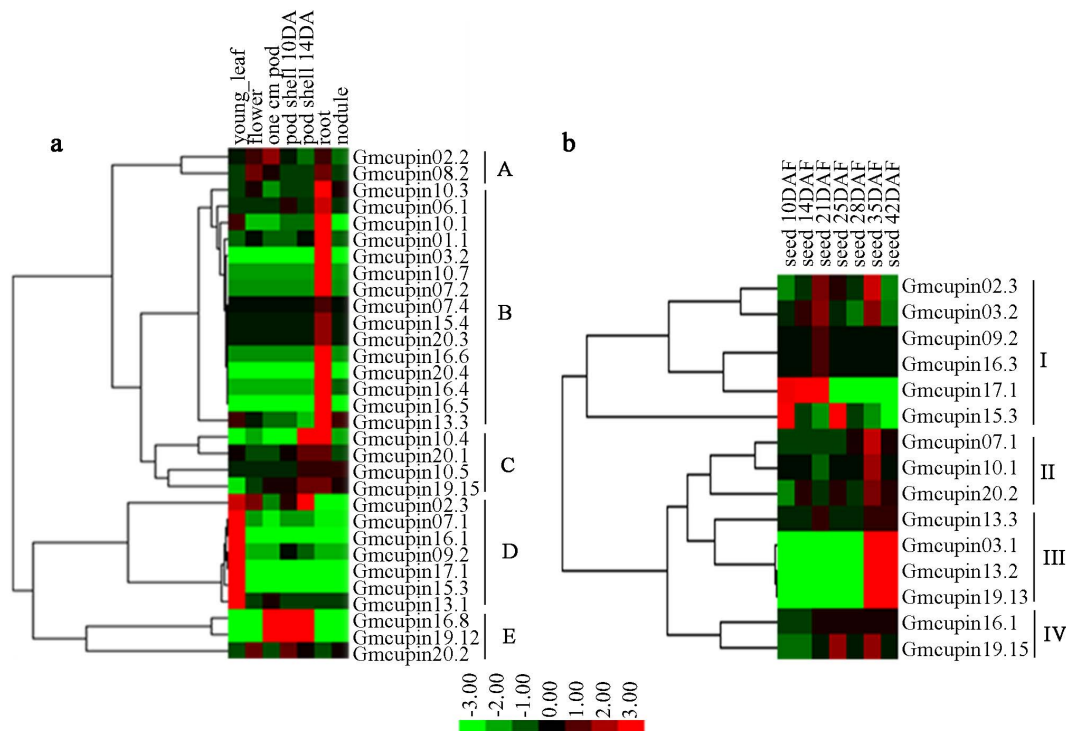

**Figure 5. Expression profiles of 35 expressed *Gmcupin* genes in different tissues.** a. Heatmap showing hierarchical clustering of 35 expressed *Gmcupin* genes among various tissues analyzed. b. Heatmap showing hierarchical clustering of 35 expressed *Gmcupin* genes during the development of soybean seeds. doi:10.1371/journal.pone.01110092.g005

**Table 3.** Selected sites of *Gmcupin* genes during soybean domestication.

| Name        | Position | SNPs   |          | Name         | Position     | SNPs        |             |             |          |        |
|-------------|----------|--------|----------|--------------|--------------|-------------|-------------|-------------|----------|--------|
|             |          | Wild   | Cultivar |              |              | Wild        | Cultivar    |             |          |        |
| Gmcupin03.1 | 39840871 | 11C/5T | 5C/9T    | Gmcupin10.3  | 36808227     | 9T/7A       | 1T/13A      |             |          |        |
|             | 39841560 | 8G/7T  | 0G/13T   |              | 36808469     | 10G/5A      | 1G/13A      |             |          |        |
|             | 39841777 | 8C/3T  | 3C/8T    |              | 36808488     | 10A/5G      | 1A/13G      |             |          |        |
|             | 39842153 | 10T/6A | 6T/8A    |              | 36808586     | 10A/4T      | 1A/13T      |             |          |        |
|             | 39842186 | 9T/5C  | 4T/7C    |              | 36812510     | 9C/6T       | 1C/13T      |             |          |        |
| Gmcupin07.1 | 39842508 | 10A/5G | 5A/9G    | Gmcupin10.4  | 36812530     | 10G/6A      | 1G/13A      |             |          |        |
|             | 39842704 | 10T/6A | 5T/8A    |              | 36812729     | 8G/6C       | 1G/13C      |             |          |        |
|             | 3163748  | 12A/4C | 4A/9C    |              | 39767387     | 14T/1C      | 4T/5C       |             |          |        |
|             | 3164179  | 10A/5T | 4A/9T    |              | 39768245     | 11T/1A      | 4T/6A       |             |          |        |
|             | 3167526  | 13T/4C | 4T/10C   |              | 20816255     | 13C/4A      | 5C/8A       |             |          |        |
| Gmcupin07.2 | 3167819  | 12T/4C | 4T/10C   | Gmcupin13.1  | 22112820     | 9C/7G       | 5C/9G       |             |          |        |
|             | 3167944  | 14G/3T | 4G/10T   |              | Gmcupin13.2  | 5853162     | 12C/4G      | 6C/8G       |          |        |
|             | 3168029  | 13T/2C | 4T/8C    |              |              | Gmcupin16.4 | 5853378     | 11A/6G      | 6A/7G    |        |
|             | 3168069  | 13T/2A | 4T/8A    |              |              |             | Gmcupin16.8 | 5853406     | 11G/5T   | 6G/8T  |
|             | 3179898  | 14T/2C | 4T/10C   |              |              |             |             | Gmcupin17.1 | 5951996  | 10T/4C |
| Gmcupin10.1 | 7200497  | 9C/6A  | 2C/12A   | Gmcupin19.13 |              |             |             |             | 4052528  | 10A/5C |
|             | 7200888  | 13A/4G | 2A/12G   |              | Gmcupin19.15 |             |             |             | 42367147 | 10C/4T |
|             | 7200956  | 8G/8A  | 2G/12A   |              |              | Gmcupin20.1 |             |             | 47524873 | 8A/8G  |
|             | 7201734  | 12T/4C | 2T/12C   |              |              |             | Gmcupin20.1 |             | 32106107 | 9G/8T  |
|             |          |        |          |              |              |             |             |             |          |        |

doi:10.1371/journal.pone.0110092.t003

## Differential expression profile of *Gmcupin* genes

To highlight the expression profiles of *Gmcupin* genes, we then analyzed the previously publicly-available RNA-Seq data regarding seven soybean tissues, three pod development stages and seven seed developmental stages. Thirty-five *Gmcupin* genes had sequence reads in at least one tissue, and most of them showed a distinct tissue-specific expression pattern (Figure 4). For example, two genes (*Gmcupin17.1* and *Gmcupin15.3*) had a significantly higher transcript accumulation in the young leaf of soybean. *Gmcupin16.8* was mainly expressed during pod development, while *Gmcupin16.5*, *Gmcupin03.2* and *Gmcupin20.4* were specifically expressed in soybean root. Besides, three genes (*Gmcupin03.1*, *Gmcupin13.2* and *Gmcupin19.13*) of subfamily X were highly expressed at the later stage of seed development. Most *Gmcupin* genes showed a relative low expression level in soybean nodule (Figure 4). These genes were clustered into five groups (A–E) and four groups (I–IV) based on their expression patterns in soybean tissues (except seeds) and the expression profiles during seven soybean seed development stages (Figure 5). The genes in clusters A–E were mainly expressed in flower/root, root, pod/root, young leaf and pod, respectively. Six genes in cluster I mainly expressed during the early stage of soybean seed development, while seven genes in cluster II and III mainly expressed during the later stage of soybean seed development. In addition, three genes in cluster III having a much higher and specific expression level during soybean seed development from 25 days after flower (DAF) to 42DAF. Further, genes of cluster IV were expressed in most stages of soybean seed development.

The evolutionary fates of duplicate genes may be classified into subfunctionalization (partition of original functions), neofunctionalization (acquisition of novel functions), or nonfunctionalization (loss of original functions) [47]. In this study, we investigated the functional redundancy of *Gmcupin* genes with high proportion of segmental/tandem duplications. Six paralogous pairs (*Gmcupin03.1/19.13*, *Gmcupin07.1/16.1*, *Gmcupin10.1/13.3*, *Gmcupin01.1/02.2*, *Gmcupin16.8/19.12* and *Gmcupin10.7/20.3*) derived from segmental duplications and one paralogous pair (*Gmcupin10.3/10.4*) derived from tandem duplication shared almost identical expression patterns. In contrast, the expression patterns of another seven paralogous pairs (*Gmcupin17.1/13.1*, *Gmcupin08.2/15.4*, *Gmcupin04.1/06.1*, *Gmcupin12.4/20.2*, *Gmcupin10.5/20.1*, *Gmcupin10.6/20.4* and *Gmcupin3.2/19.5*) diversified significantly. These findings indicated that expression profiles of *Gmcupins* have diverged substantially after segmental/

tandem duplications. Therefore, we speculate that *Gmcupins* have been retained by substantial subfunctionalization during soybean evolutionary processes.

## Artificial selection analysis for *Gmcupins* during soybean domestication

Thirty-five *Gmcupin* genes were analyzed for the selection effects during soybean domestication based on the sequence diversity analysis between seventeen wild soybean and fourteen cultivars. The reverse distribution of SNPs in different evolutionary type of soybeans was defined as strong selected sites, and then *Cupin* genes with one or more type of reverse distribution were assumed to undergo an artificial selection during soybean domestication. Sixteen *Gmcupins* have selected site(s), among which more than one selected sites were determined in 8 *Gmcupins* and one selected sites in 8 genes (Table 3). Additionally, all SNP sites were selected in *Gmcupin10.3* and *Gmcupin07.2* genes, which implied these genes may have undergone strong selection effects during soybean domestication. Interestingly, selected sites were identified in *Gmcupin03.1* (7 sites), *Gmcupin13.2* (1 site) and *Gmcupin19.13* (1 site) that were highly expressed at the later stages of soybean seed. The genetic diversity of most *Gmcupins* was declined sharply in cultivars compared with that of wild soybeans. However, *Gmcupin10.7* gene that specifically expressed in soybean root showed three types of haplotype in wild soybeans, while four types of haplotype were identified in cultivars. Further, a new type of haplotype in *Gmcupin10.7* appeared during soybean domestication under the pressure of artificial selection, which would endow it with new functions. These selected genes reflected the important roles of *Gmcupins* on soybean domestication and contribute to the cultivation of soybeans in order to meet the demands of human beings.

## Supporting Information

**Table S1** Pairwise identities between homologous pairs of Cupin genes from soybean.  
(DOC)

## Author Contributions

Conceived and designed the experiments: XBW IJQ. Performed the experiments: XBW HWZ YLG. Analyzed the data: XBW GLS IJQ. Contributed reagents/materials/analysis tools: XBW YLG WMZ. Wrote the paper: XBW IJQ GLS.

## References

- Dunwell JM, Purvis A, Khuri S (2004) Cupins: the most functionally diverse protein superfamily? *Phytochemistry* 65: 7–17.
- Dunwell JM (1998) Cupins: a new superfamily of functionally diverse proteins that include germins and plant storage proteins. *Biotechnol Genet Eng Rev* 15: 1–32.
- Thompson EW, Lane BG (1980) Relation of protein synthesis in imbibing wheat embryos to the cell-free translational capacities of bulk mRNA from dry and imbibing embryos. *J Biol Chem* 255: 5965–5970.
- Jaikaran AS, Kennedy TD, Dratewka-Kos E, Lane BG (1990) Covalently bonded and adventitious glycans in germin. *J Biol Chem* 265: 12503–12512.
- Lane BG, Dunwell JM, Ray JA, Schmitt MR, Cuming AC (1993) Germin, a protein marker of early plant development, is an oxalate oxidase. *J Biol Chem* 268: 12239–12242.
- Patnaik D, Khurana P (2001) Germins and germin like proteins: an overview. *Indian J Exp Biol* 39: 191–200.
- Dunwell JM, Khuri S, Gane PJ (2000) Microbial relatives of the seed storage proteins of higher plants: conservation of structure and diversification of function during evolution of the cupin superfamily. *Microbiol Mol Biol Rev* 64: 153–179.
- Dunwell JM, Culham A, Carter CE, Sosa-Aguirre CR, Goodenough PW (2001) Evolution of functional diversity in the cupin superfamily. *Trends Biochem Sci* 26: 740–746.
- Dunwell JM, Gibbins JG, Mahmood T, Naqvi SMS (2008) Germin and germin-like proteins: Evolution, structure, and function. *Crit Rev Plant Sci* 27: 342–375.
- Dunwell JM (1998) Sequence analysis of the cupin gene family in *Synechocystis* PCC6803. *Microb Comp Genomics* 3: 141–148.
- Carter C, Graham RA, Thornburg RW (1998) Arabidopsis thaliana contains a large family of germin-like proteins: characterization of cDNA and genomic sequences encoding 12 unique family members. *Plant Mol Biol* 38: 929–943.
- Membre N, Bernier F, Staiger D, Berna A (2000) Arabidopsis thaliana germin-like proteins: common and specific features point to a variety of functions. *Planta* 211: 345–354.
- Membre N, Berna A, Neutelings G, David A, David H, et al. (1997) cDNA sequence, genomic organization and differential expression of three Arabidopsis genes for germin/oxalate oxidase-like proteins. *Plant Mol Biol* 35: 459–469.
- Lapik YR, Kaufman LS (2003) The Arabidopsis cupin domain protein AtPirin1 interacts with the G protein alpha-subunit GPA1 and regulates seed germination and early seedling development. *Plant Cell* 15: 1578–1590.
- Ham BK, Li G, Kang BH, Zeng F, Lucas WJ (2012) Overexpression of Arabidopsis plasmodesmata germin-like proteins disrupts root growth and development. *Plant Cell* 24: 3630–3648.
- Pelah D, Shoseyov O, Altman A (1995) Characterization of BspA, a major boiling-stable, water-stress-responsive protein in aspen (*Populus tremula*). *Tree physiol* 15: 673–678.

17. Leon-Galvan F, Joaquin-Ramos AD, Torres-Pacheco I, de la Rosa APB, Guevara-Olvera L, et al. (2011) A Germin-Like Protein Gene (CchGLP) of *Capsicum chinense* Jacq. Is Induced during Incompatible Interactions and Displays Mn-Superoxide Dismutase Activity. *Int J Mol Sci* 12: 7301–7313.
18. Carter C, Thornburg RW (2000) Tobacco nectarin I - Purification and characterization as a germin-like, manganese superoxide dismutase implicated in the defense of floral reproductive tissues. *J Biol Chem* 275: 36726–36733.
19. Woo EJ, Dunwell JM, Goodenough PW, Marvier AC, Pickersgill RW (2000) Germin is a manganese containing homohexamer with oxalate oxidase and superoxide dismutase activities. *Nat Struct Biol* 7: 1036–1040.
20. Nakata M, Shiono T, Watanabe Y, Satoh T (2002) Salt stress-induced dissociation from cells of a germin-like protein with manganese superoxide dismutase activity and an increase in its mRNA in a moss, *Barbula unguiculata*. *Plant Cell Physiol* 43: S55–S55.
21. van Loon LC, Rep M, Pieterse CMJ (2006) Significance of inducible defense-related proteins in infected plants. *Annu Rev Phytopathol* 44: 135–162.
22. Manosalva PM, Davidson RM, Liu B, Zhu XY, Hulbert SH, et al. (2009) A Germin-Like Protein Gene Family Functions as a Complex Quantitative Trait Locus Conferring Broad-Spectrum Disease Resistance in Rice. *Plant Physiol* 149: 286–296.
23. Druka A, Kudrna D, Kannangara CG, von Wettstein D, Kleinohs A (2002) Physical and genetic mapping of barley (*Hordeum vulgare*) germin-like cDNAs. *Proc Natl Acad Sci U S A* 99: 850–855.
24. Manosalva PM, Davidson RM, Liu B, Zhu X, Hulbert SH, et al. (2009) A germin-like protein gene family functions as a complex quantitative trait locus conferring broad-spectrum disease resistance in rice. *Plant Physiol* 149: 286–296.
25. Lu M, Han YP, Gao JG, Wang XJ, Li WB (2010) Identification and analysis of the germin-like gene family in soybean. *Bmc Genomics* 11.
26. Schmutz J, Cannon SB, Schlueter J, Ma J, Mitros T, et al. (2010) Genome sequence of the paleopolyploid soybean. *Nature* 463: 178–183.
27. Goodstein DM, Shu S, Howson R, Neupane R, Hayes RD, et al. (2012) Phytozome: a comparative platform for green plant genomics. *Nucleic acids research* 40: D1178–1186.
28. Quevillon E, Silventoinen V, Pillai S, Harte N, Mulder N, et al. (2005) InterProScan: protein domains identifier. *Nucleic acids research* 33: W116–120.
29. Thompson JD, Gibson TJ, Plewniak F, Jeanmougin F, Higgins DG (1997) The CLUSTAL\_X windows interface: flexible strategies for multiple sequence alignment aided by quality analysis tools. *Nucleic acids research* 25: 4876–4882.
30. Tamura K, Peterson D, Peterson N, Stecher G, Nei M, et al. (2011) MEGA5: molecular evolutionary genetics analysis using maximum likelihood, evolutionary distance, and maximum parsimony methods. *Mol Biol Evol* 28: 2731–2739.
31. Bailey TL, Williams N, Misleh C, Li WW (2006) MEME: discovering and analyzing DNA and protein sequence motifs. *Nucleic acids research* 34: W369–373.
32. Guo AY, Zhu QH, Chen X, Luo JC (2007) GSDS: a gene structure display server. *Yi chuan* 29: 1023–1026.
33. Cannon EK, Cannon SB (2011) Chromosome visualization tool: a whole genome viewer. *International journal of plant genomics* 2011: 373875.
34. Cannon SB, Shoemaker RC (2012) Evolutionary and comparative analyses of the soybean genome. *Breeding science* 61: 437–444.
35. Librado P, Rozas J (2009) DnaSP v5: a software for comprehensive analysis of DNA polymorphism data. *Bioinformatics* 25: 1451–1452.
36. Lavin M, Herendeen PS, Wojciechowski MF (2005) Evolutionary rates analysis of Leguminosae implicates a rapid diversification of lineages during the tertiary. *Systematic biology* 54: 575–594.
37. Lynch M, Conery JS (2000) The evolutionary fate and consequences of duplicate genes. *Science* 290: 1151–1155.
38. de Hoon MJ, Imoto S, Nolan J, Miyano S (2004) Open source clustering software. *Bioinformatics* 20: 1453–1454.
39. Page RD (1996) TreeView: an application to display phylogenetic trees on personal computers. *Computer applications in the biosciences: CABIOS* 12: 357–358.
40. Lam HM, Xu X, Liu X, Chen W, Yang G, et al. (2010) Resequencing of 31 wild and cultivated soybean genomes identifies patterns of genetic diversity and selection. *Nature genetics* 42: 1053–1059.
41. Yamahara T, Shiono T, Suzuki T, Tanaka K, Takio S, et al. (1999) Isolation of a germin-like protein with manganese superoxide dismutase activity from cells of a moss, *Barbula unguiculata*. *J Biol Chem* 274: 33274–33278.
42. Woo EJ, Baully J, Chen JG, Marshall J, Macdonald H, et al. (2000) Crystallization and preliminary X-ray analysis of the auxin receptor ABP1. *Acta crystallographica Section D, Biological crystallography* 56: 1476–1478.
43. Anand R, Dorrestein PC, Kinsland C, Begley TP, Ealick SE (2002) Structure of oxalate decarboxylase from *Bacillus subtilis* at 1.75 angstrom resolution. *Biochemistry-U S A* 41: 7659–7669.
44. Freeling M (2009) Bias in plant gene content following different sorts of duplication: tandem, whole-genome, segmental, or by transposition. *Annual review of plant biology* 60: 433–453.
45. Schlueter JA, Lin JY, Schlueter SD, Vasylenko-Sanders IF, Deshpande S, et al. (2007) Gene duplication and paleopolyploidy in soybean and the implications for whole genome sequencing. *Bmc Genomics* 8: 330.
46. Liu Y, Jiang HY, Chen WJ, Qian YX, Ma Q, et al. (2011) Genome-wide analysis of the auxin response factor (ARF) gene family in maize (*Zea mays*). *Plant Growth Regul* 63: 225–234.
47. Prince VE, Pickett FB (2002) Splitting pairs: the diverging fates of duplicated genes. *Nature reviews Genetics* 3: 827–837.
